# Supplementary material
Source: PubMed Central journal article supplement (PMC3710802)
Supplement: 1303178110_pnas.201303178SI.pdf [file 1303178110_pnas.201303178SI.pdf]

# Supporting Information

Tsurugizawa et al. 10.1073/pnas.1303178110

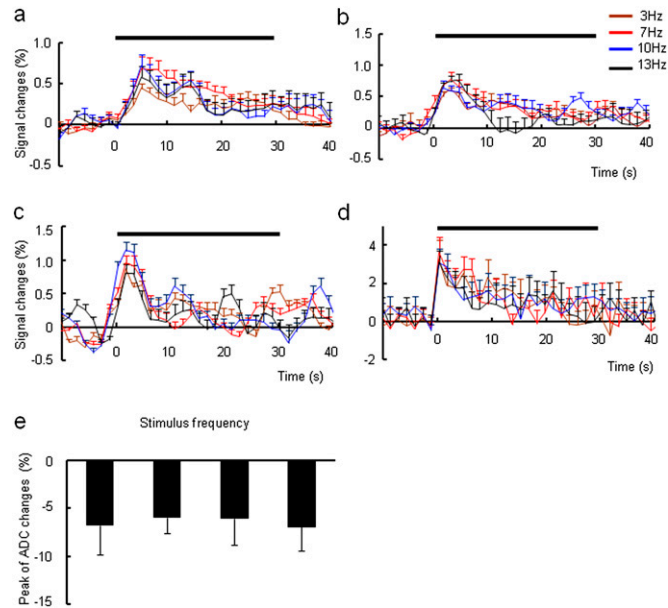

**Fig. S1.** Averaged (over animals and blocks) time courses for gradient echo (GE)-BOLD (A), spin echo (SE)-BOLD (B), DfMRI (C) and raw local field potentials ( $\Sigma$ LFPs) (D) recorded from a 3-, 7-, 10-, and 13-Hz forepaw electrical stimulation paradigm under 1.5% isoflurane anesthesia. Data were expressed as mean  $\pm$  SEM. (E) apparent diffusion coefficient (ADC) changes at each frequency.

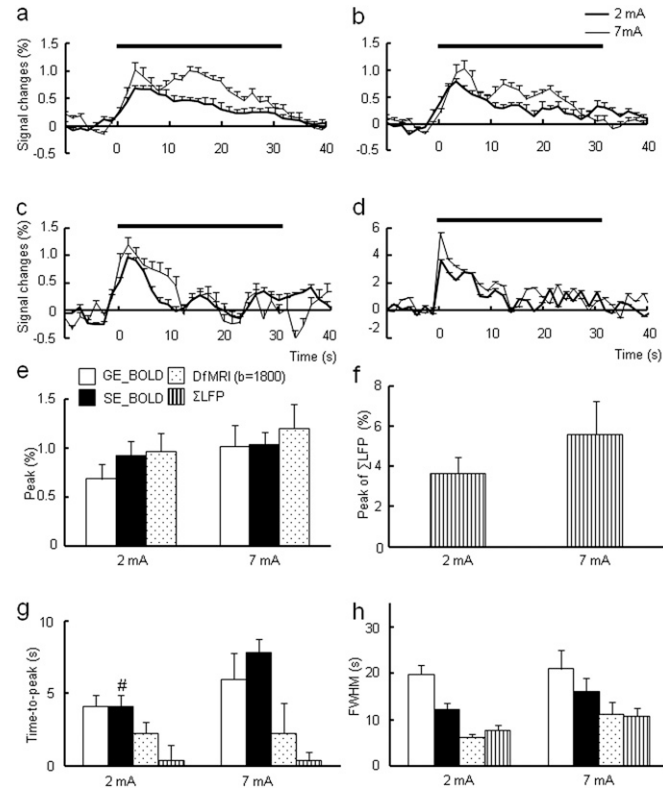

**Fig. S2.** Averaged (over animals and blocks) time courses for GE-BOLD (*A*), SE-BOLD (*B*), DfMRI (*C*), and ΔLFPs (*D*) recorded from a 7-Hz forepaw electrical stimulation paradigm under 1.5% isoflurane anesthesia at 2 and 7 mA. Data were expressed as mean ± SEM. (*E*) Peak value of BOLD, diffusion MRI (DfMRI) responses, and (*F*) ΔLFP, (*G*) time-to-peak of BOLD and DfMRI, (*H*) full width at half maximum (FWHM) of BOLD and DfMRI responses by the two stimulation intensities (2 and 7 mA); \* $P < 0.05$  compared with 7 mA.

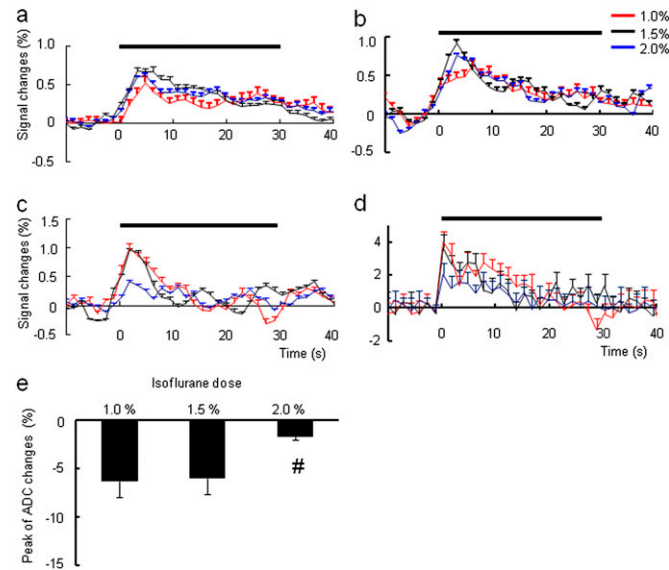

**Fig. S3.** Averaged (over animals and blocks) time courses for GE-BOLD (*A*), SE-BOLD (*B*), DfMRI (*C*), and LFPs (*D*) recorded from a 7-Hz forepaw electrical stimulation paradigm under 1.0%, 1.5%, and 2.0% isoflurane anesthesia. Data were expressed as mean ± SEM. (*E*) ADC changes at each isoflurane levels; # $P < 0.05$  compared with 1.0% and 1.5% isoflurane.

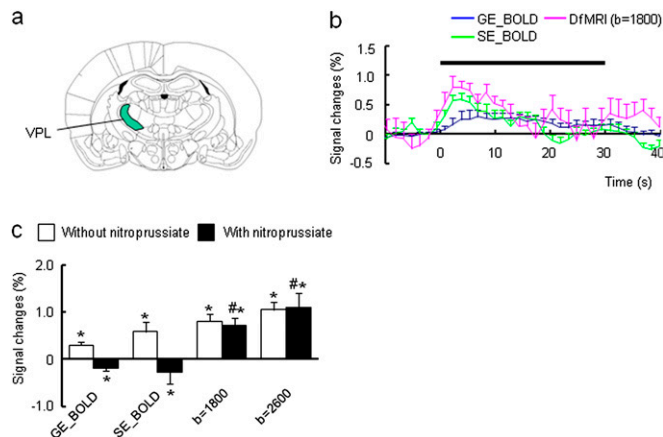

**Fig. 54.** (A) Location of the ventral posterolateral nucleus (VPL). (B) Averaged (over animals and blocks) time courses in the VPL for GE-BOLD, SE-BOLD, and DfMRI recorded from a 7-Hz forepaw electrical stimulation paradigm under 1.5% isoflurane anesthesia. Data were expressed as mean  $\pm$  SEM. (C) Peak value of BOLD and DfMRI responses ( $b = 1,800$  and  $2,600$ ) by 7-Hz electrical stimulation with and without nitroprussiate under 1.5% isoflurane levels; \* $P < 0.05$  compared with basal; # $P < 0.05$  compared with GE and SE. Statistical comparison between BOLD and DfMRI (all  $b$  value) was done using ANOVA and post hoc Tukey–Kramer test for group comparisons. The statistical comparison with the basal level was done using paired  $t$  test. Data were expressed as mean  $\pm$  SEM.
